# Supplementary material for: Methane intensity and emissions across major oil and gas basins and individual jurisdictions using MethaneSAT observations
Source: Copernicus journal article supplement (doi:10.5194/egusphere-2025-6126), 2025-12-30
Supplement: Supplementary file 1 [file egusphere-2025-6126-supplement.pdf]

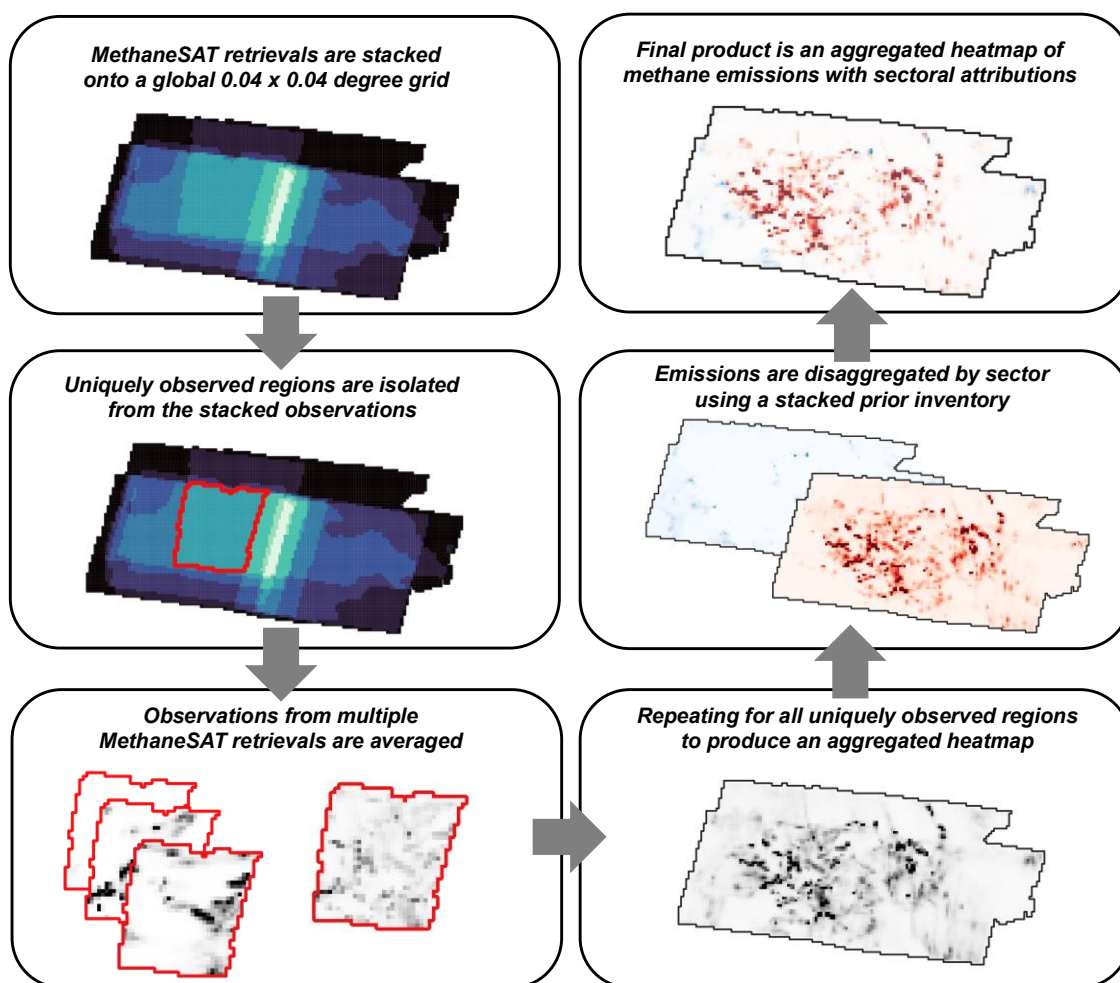

**Fig. S1:** Diagram illustrating the methodology associated with the aggregation of multiple overlapping MethaneSAT emissions maps into a single regional estimate of methane emissions and the sectoral disaggregation of methane emissions derived from MethaneSAT observations.

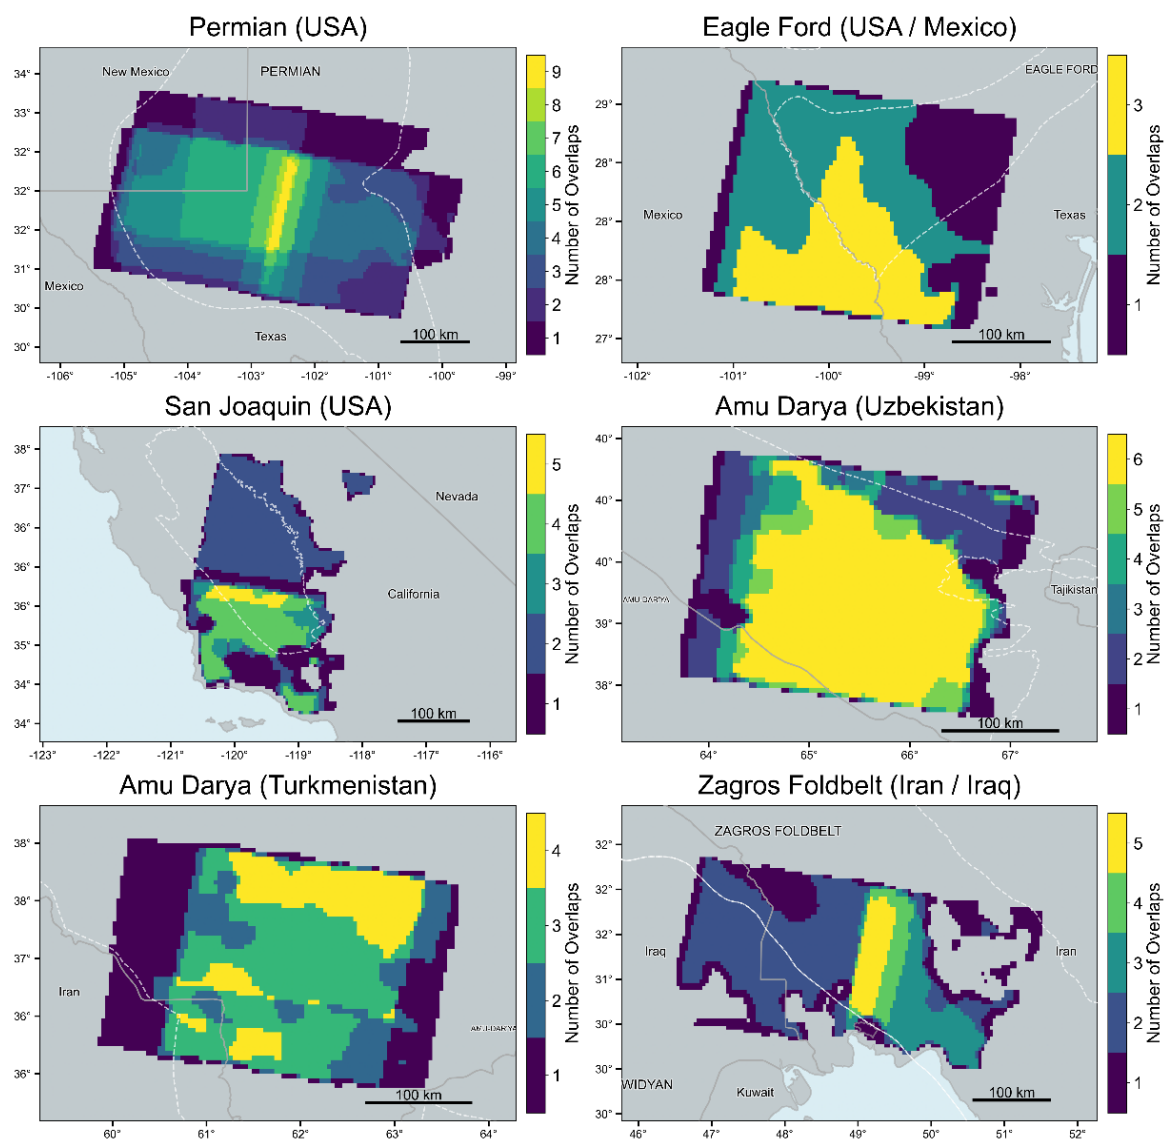

**Fig. S2:** Maps displaying the number of repeatedly observed areas from the aggregated MethaneSAT retrievals in the Permian (US), Eagle Ford (US, Mexico), San Joaquin (US), two separate Amu Darya regions in Turkmenistan and Uzbekistan, and the Zagros Foldbelt (Iran, Iraq). Aggregated collections are colored by the number of MethaneSAT observations, which range from a maximum of nine overlapping retrievals in the Permian to three in the Eagle Ford.

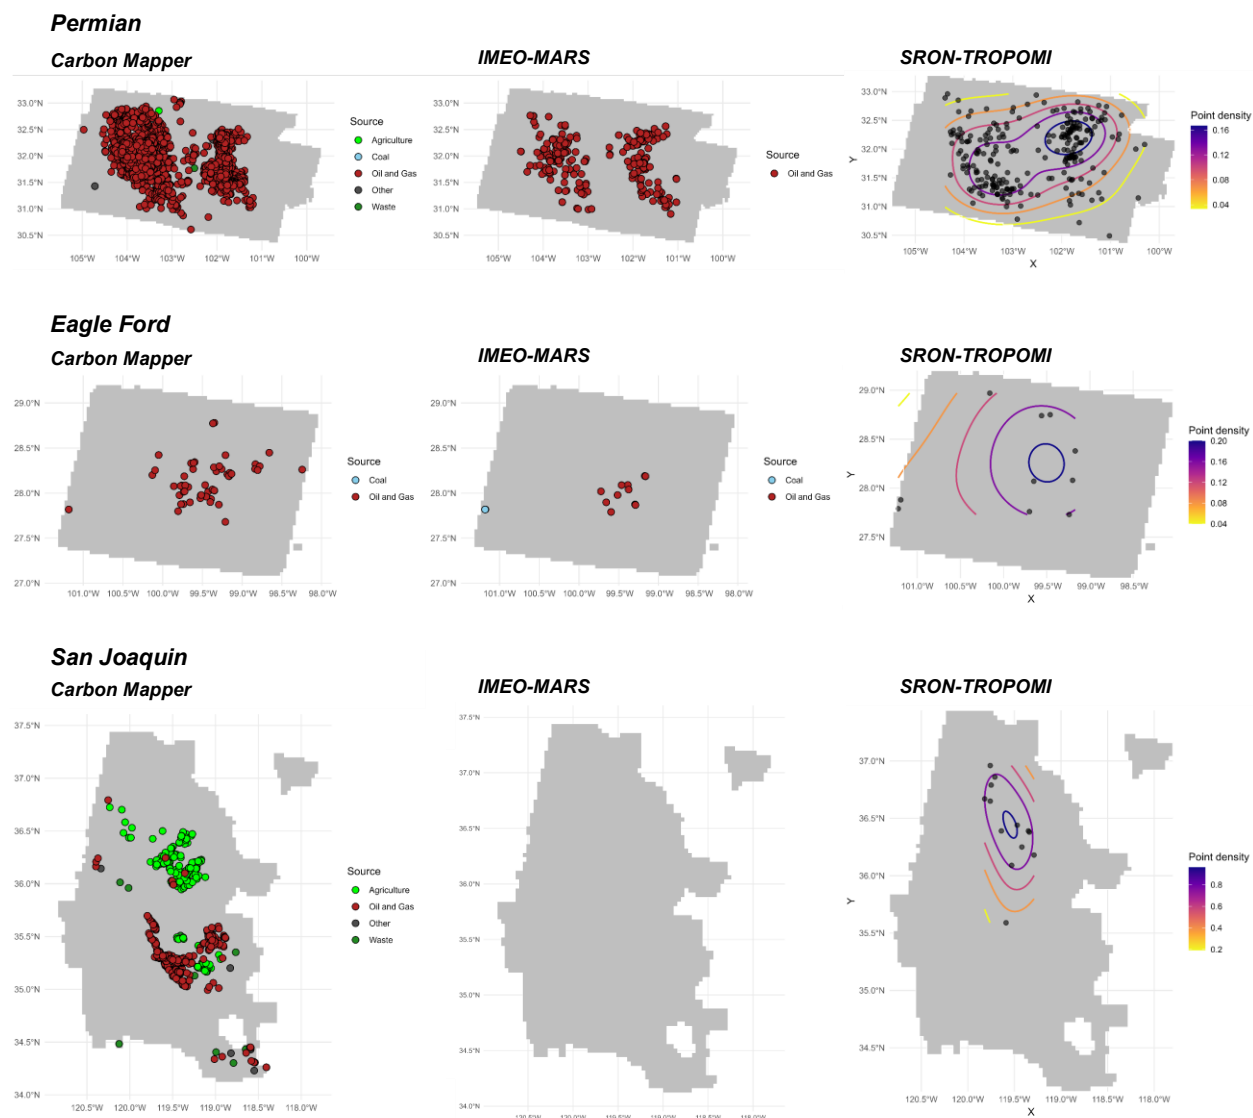

**Fig. S3:** Maps of distinct point source detections in the US regions from various satellite-based platforms including Carbon Mapper (Tanager, AVIRIS-NG), IMEO-MARS (EMIT, PRISMA), and SRON-TROPOMI (Sentinel 5P). Methane sources detected by Sentinel 5P are effectively methane hotspots, and are subject to a higher degree of spatial uncertainty compared to the other satellite-based instruments. Note that a lack of point source detections in any one region could simply reflect a lack of focused targeting in the instrument(s).

### Amu Darya – Turkmenistan Carbon Mapper

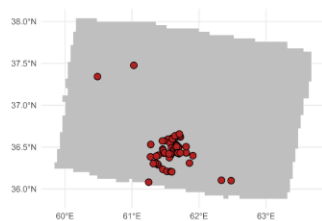

### IMEO-MARS

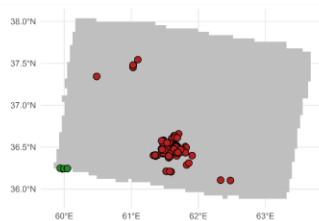

### SRON-TROPOMI

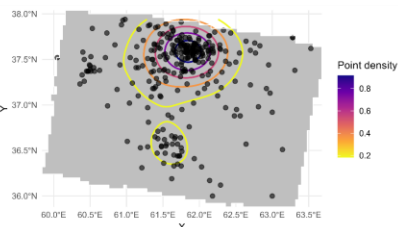

### Amu Darya – Uzbekistan Carbon Mapper

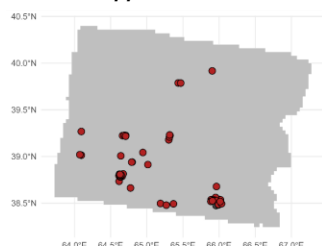

### IMEO-MARS

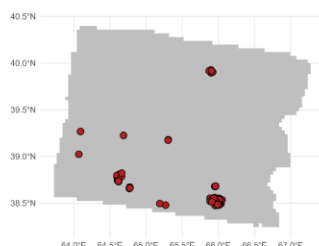

### SRON-TROPOMI

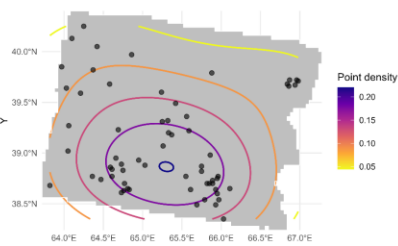

### Zagros Foldbelt Carbon Mapper

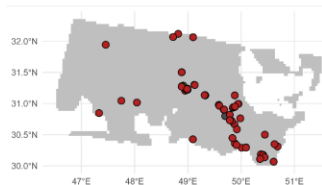

### IMEO-MARS

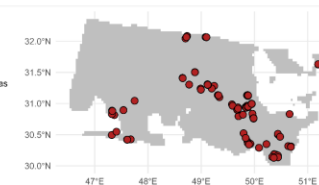

### SRON-TROPOMI

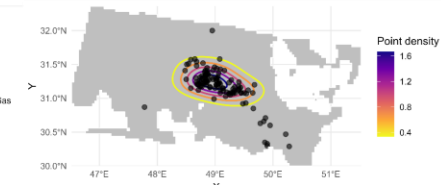

**Fig. S4:** Maps of distinct point source detections in the regions outside of the US from various satellite-based platforms including Carbon Mapper (Tanager, AVIRIS-NG), IMEO-MARS (EMIT, PRISMA), and SRON-TROPOMI (Sentinel 5P). Methane sources detected by Sentinel 5P are effectively methane hotspots and are subject to a higher degree of spatial uncertainty compared to the other satellite-based instruments. Note that a lack of point source detections in any one region could simply reflect a lack of focused targeting in the instrument(s).

### ***Oil and gas methane emissions***

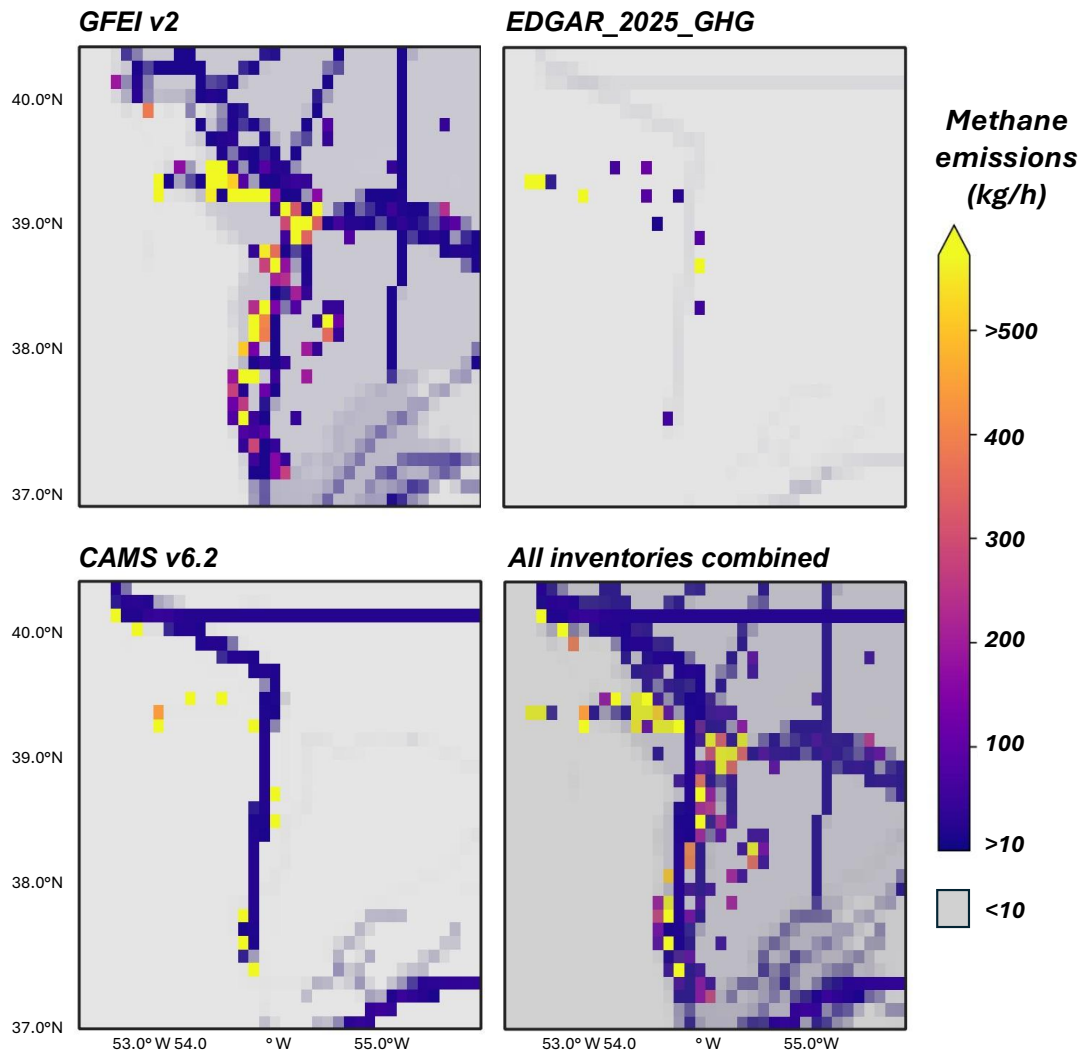

**Fig. S5:** Example of differences in spatially-explicit bottom-up inventories in the magnitude and spatial allocation of methane emissions from the oil and gas sector. All three inventories are combined to form a compositive inventory – which is presented in the bottom right hand panel. The example region is the South Caspian region of Turkmenistan.

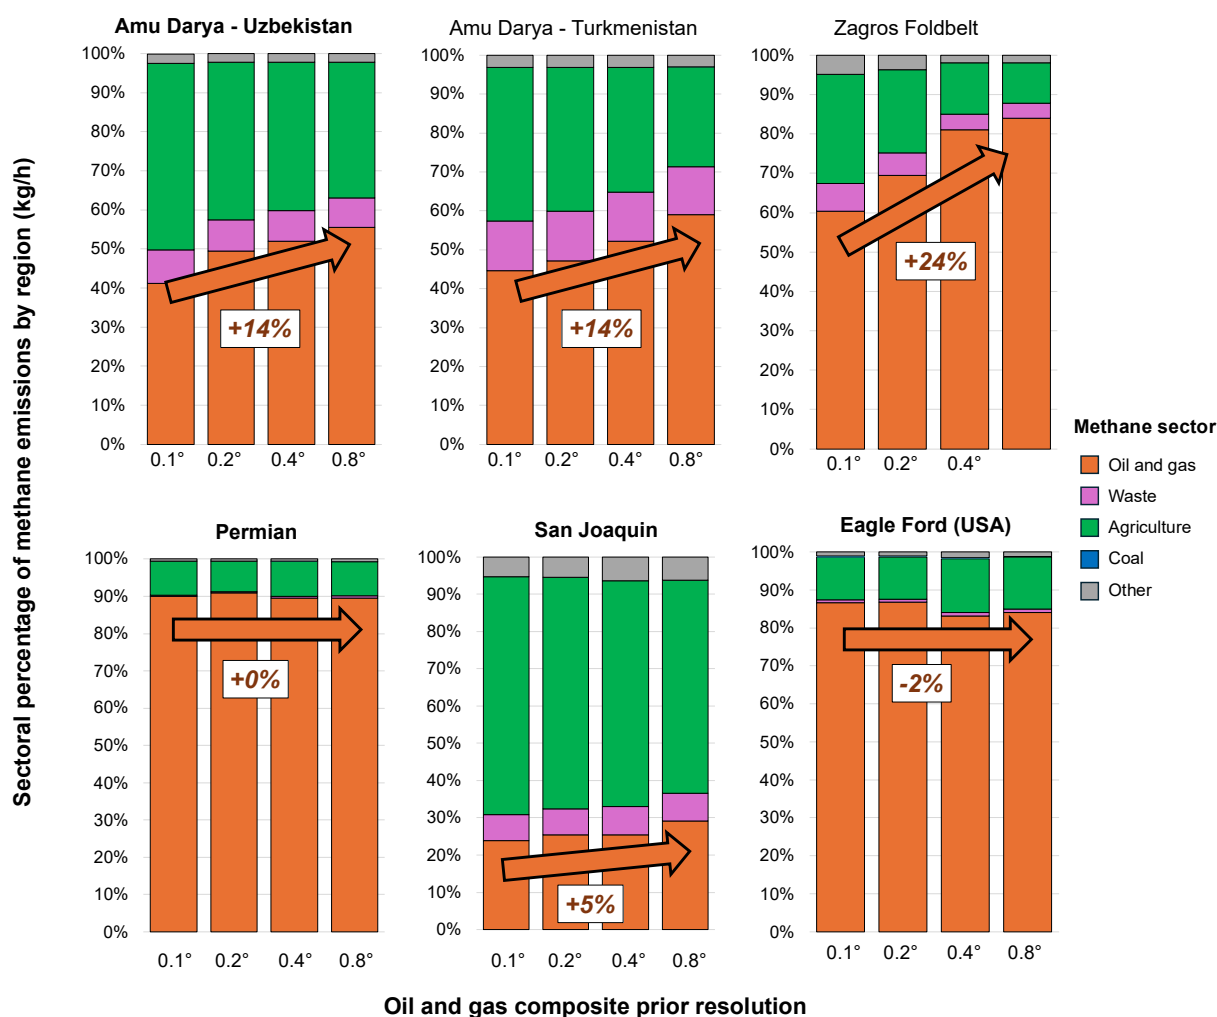

**Fig. S6:** Impacts of varying the resolution of the oil and gas sectoral emissions from the stacked prior inventory used to disaggregate methane emissions estimates from MethaneSAT. Results of the sensitivity test for all six regions are shown. The percentage difference in the sectoral allocation of emissions under the different scenarios are indicated by the inset text, and represent the difference between the oil and gas composite resolution of 0.1° (i.e., the native resolution of the bottom-up inventories) and 0.8°. IN the main text, we use a resolution of 0.4° for the composite oil and gas emissions for all regions outside of the us, while maintaining a native resolution of 0.1° for all regions within the US.

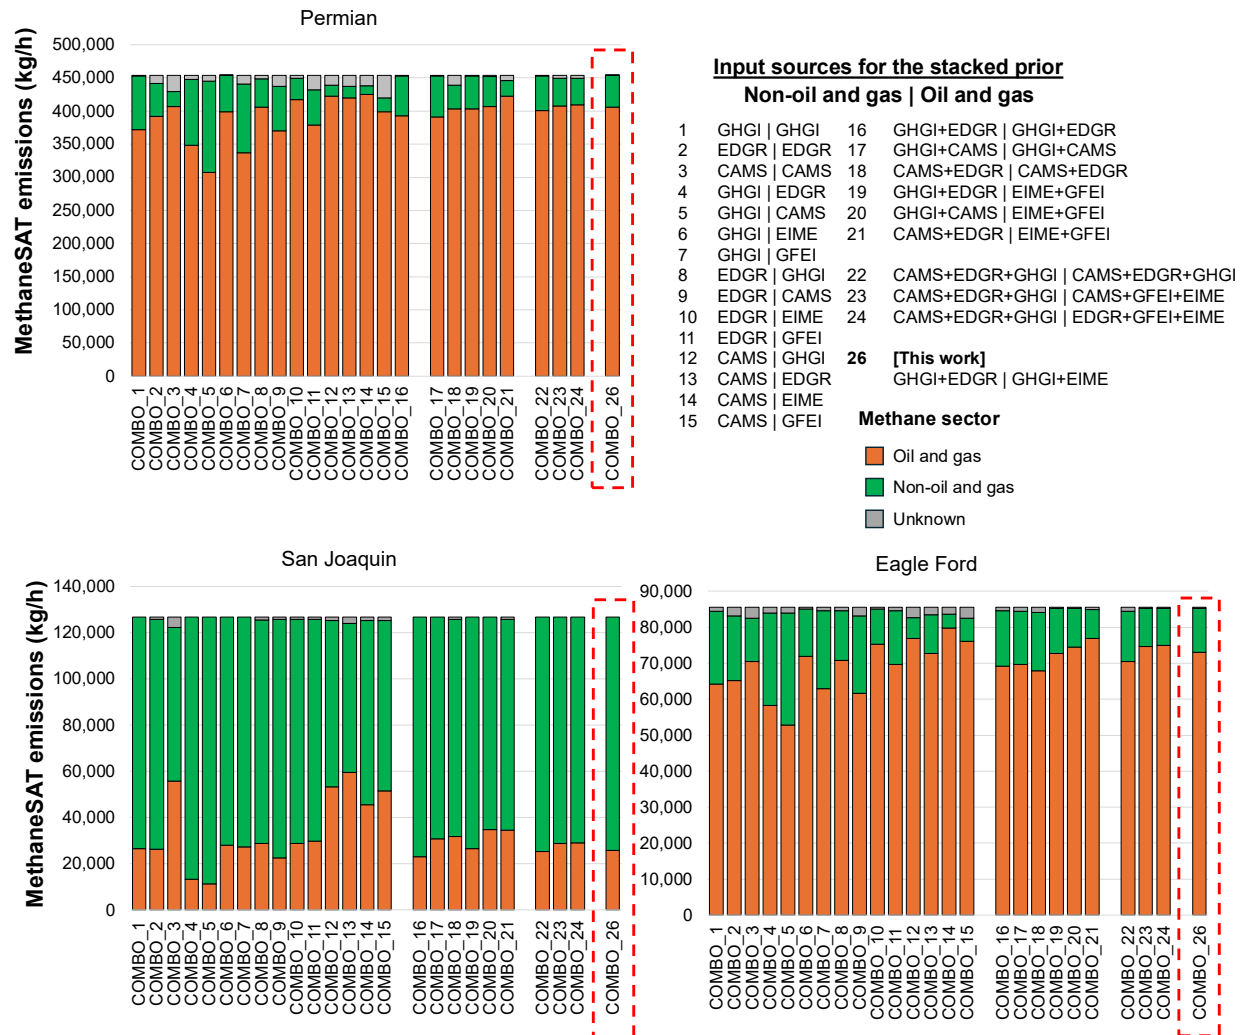

**Fig. S7:** Impacts of varying the input data used in the stacked prior inventory to disaggregate methane emissions from the MethaneSAT observations for regions in the US. The impacts of the inclusion of Carbon Mapper point sources are also not shown. The specific combination of inventories we present in this work are highlighted in the dashed red bars.

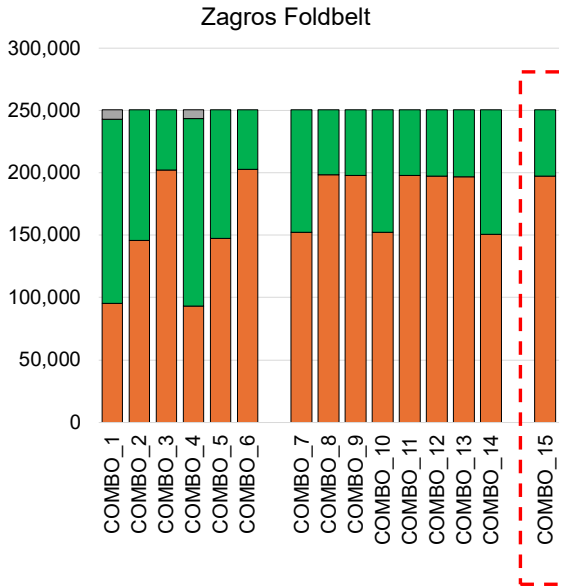

**Input sources for the stacked prior**

**Non-oil and gas | Oil and gas**

- |   |      |      |    |           |           |
|---|------|------|----|-----------|-----------|
| 1 | EDGR | EDGR | 7  | EDGR+EDGR | EDGR+CAMS |
| 2 | EDGR | CAMS | 8  | EDGR+EDGR | EDGR+GFEI |
| 3 | EDGR | GFEI | 9  | EDGR+EDGR | CAMS+GFEI |
| 4 | CAMS | EDGR | 10 | CAMS+CAMS | EDGR+CAMS |
| 5 | CAMS | CAMS | 11 | CAMS+CAMS | EDGR+GFEI |
| 6 | CAMS | GFEI | 12 | CAMS+CAMS | CAMS+GFEI |
|   |      |      | 13 | CAMS+EDGR | CAMS+GFEI |
|   |      |      | 14 | CAMS+EDGR | CAMS+EDGR |

**Methane sector**

- Oil and gas
- Non-oil and gas
- Unknown

**[This work]**

- 15 CAMS+EDGR | GFEI+EDGR

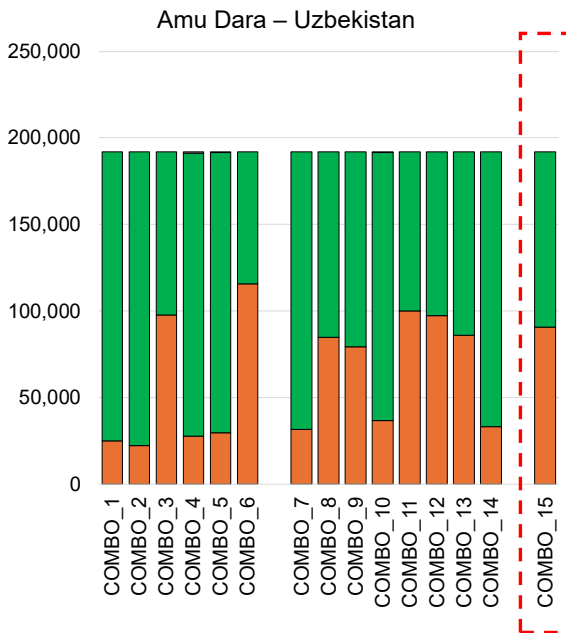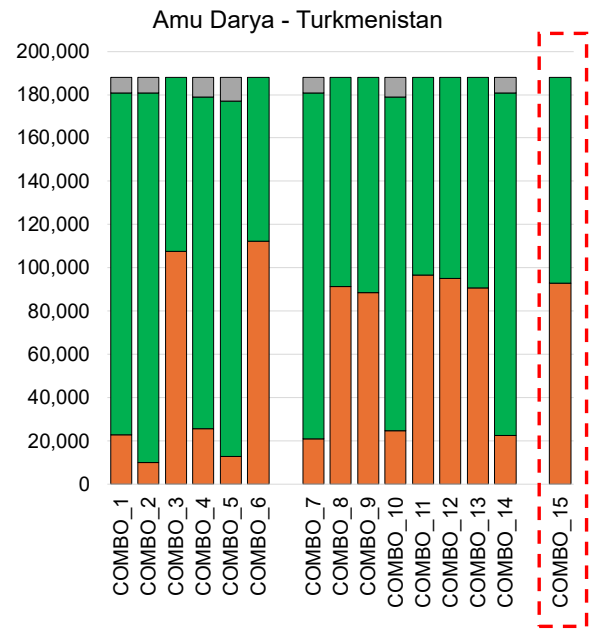

**Fig. S8:** Impacts of varying the input data used in the stacked prior inventory to disaggregate methane emissions from the MethaneSAT observations for regions outside of the US. The impacts of the inclusion of Carbon Mapper point sources are also not shown. The specific combination of inventories we present in this work are highlighted in the dashed red bars.



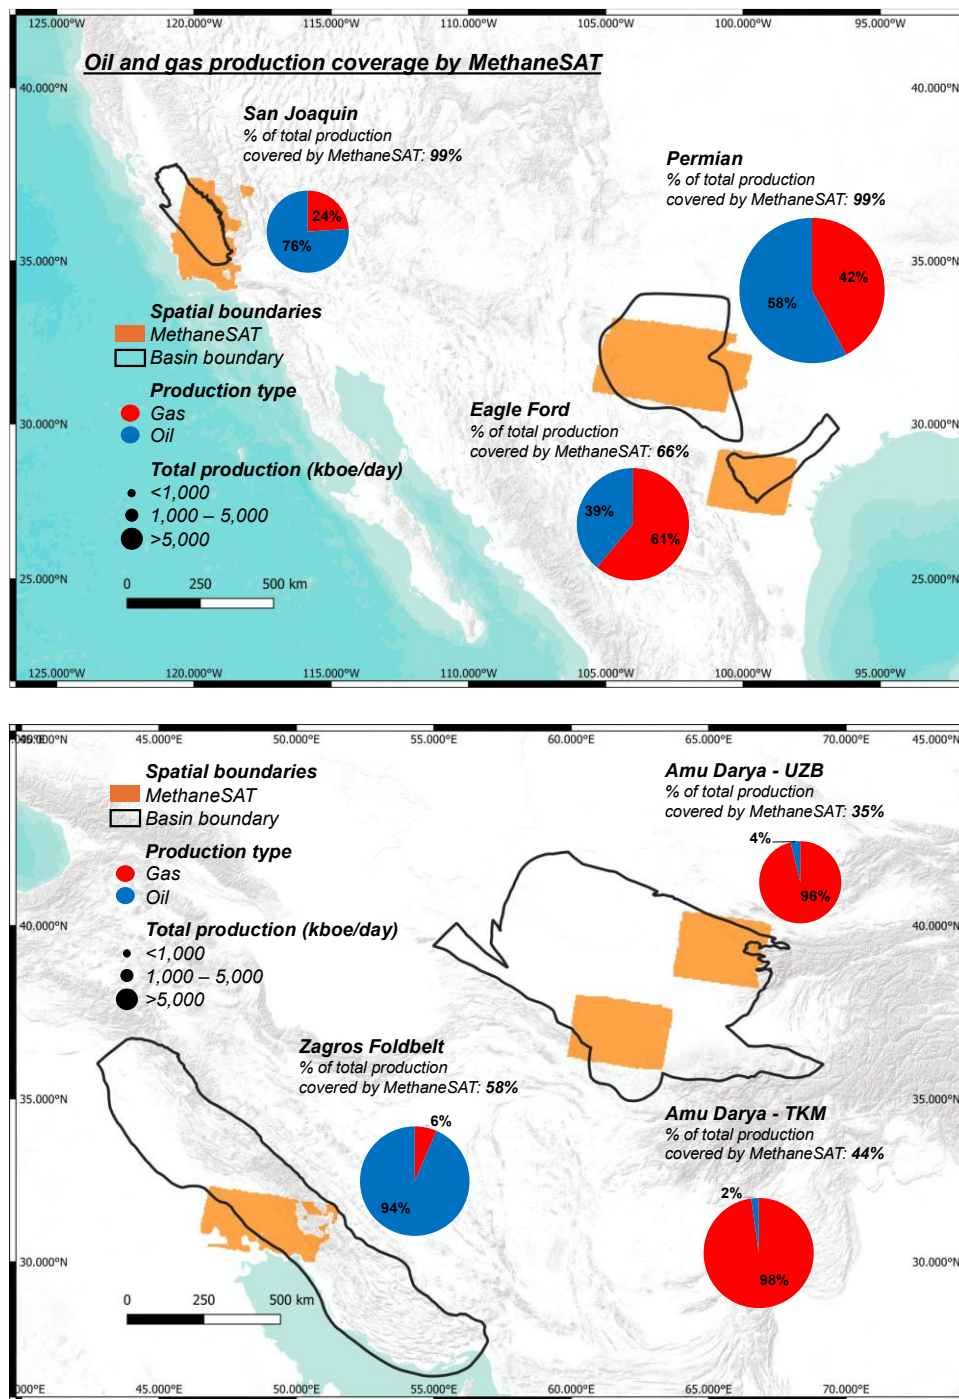

**Fig. S9:** Map of MethaneSAT aggregated observation domains overlain with spatial boundaries of the primary oil and gas basins associated with the retrievals. The percentage of total oil and gas production contained within the MethaneSAT aggregated observation domains relative to the total production within the oil and gas basin boundaries are shown. The ratios of total oil and gas to total production within the MethaneSAT observed sections of the oil and gas basin are indicated by the pie charts. Basemaps are provided from the ESRI World Terrain basemaps ([https://services.arcgisonline.com/ArcGIS/rest/services/World\\_Terrain\\_Base/MapServer](https://services.arcgisonline.com/ArcGIS/rest/services/World_Terrain_Base/MapServer)).

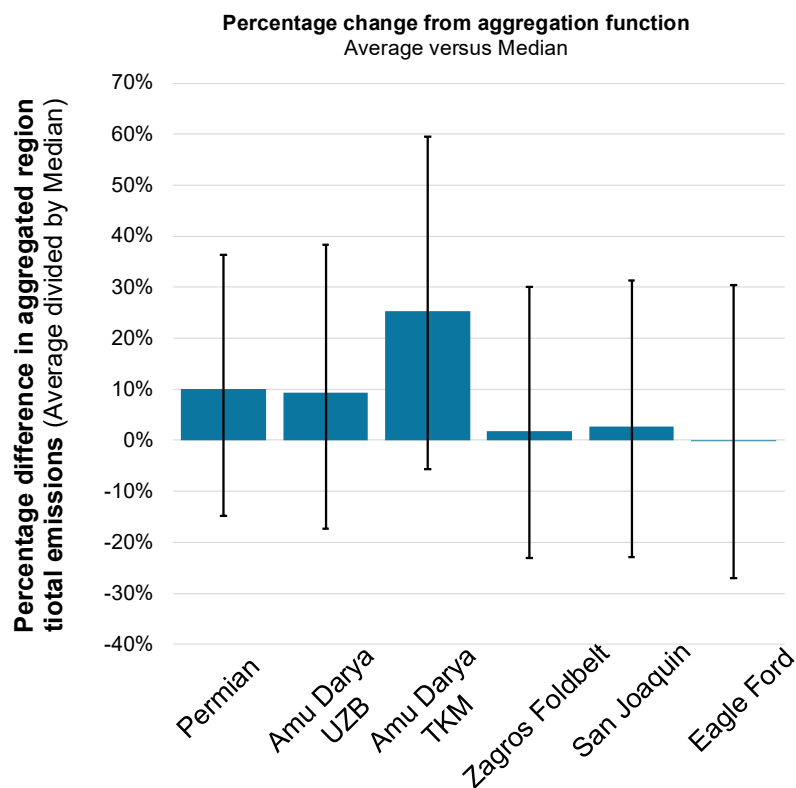

**Fig. S10:** Sensitivity test showing the percentage difference in total methane emissions estimates after performing the aggregation of MethaneSAT scenes using the median instead of the mean when multiple days of MethaneSAT emissions data are available for a grid cell. The largest difference was found in the Amu Darya – TKM, whereas the Zagros Foldbelt, San Joaquin, and Eagle Ford are relatively unchanged when using the median instead of the mean.

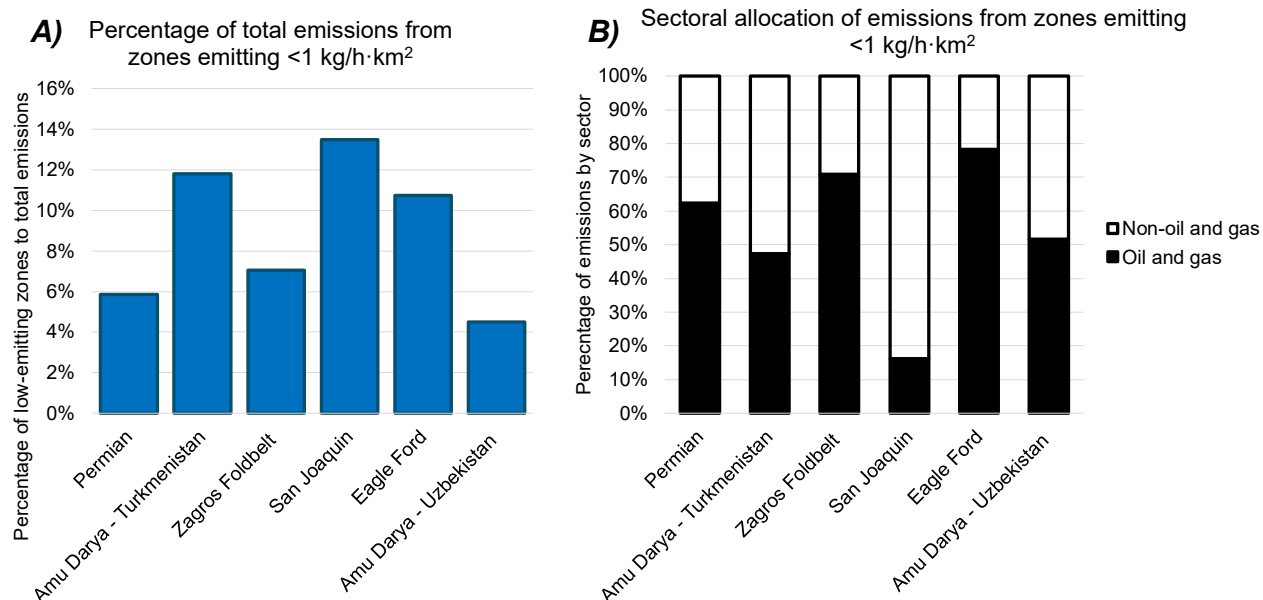

**Fig. S11:** A) Analysis of the percentage of total methane emissions from the aggregated MethaneSAT emissions estimates originating from low-emitting zones (i.e., single  $4 \times 4 \text{ km}$  grid cells) with emissions below  $1 \text{ kg/h}\cdot\text{km}^2$ . B) Broad sectoral breakdowns of the cumulative emissions from low-emitting zones ( $<1 \text{ kg/h}\cdot\text{km}^2$ ) based on oil and gas versus non-oil and gas emissions.

**Table S1:** Description of 33 MethaneSAT observations displaying total methane emissions, total geographic coverage, and emissions for the aggregated observation domains.

| Region ID | Retrieval date | Countries | Primary oil and gas basin | Area covered (km <sup>2</sup> ) | Total methane emissions (t/h) [95% c.i.] | Full observation domain (t/h) [95% c.i.] |
|-----------|----------------|-----------|---------------------------|---------------------------------|------------------------------------------|------------------------------------------|
| A         | 5/22/2024      | USA       | Permian                   | 48,000                          | 87 [58 - 121]                            | 454 [351 - 563]                          |
|           | 9/11/2024      | USA       | Permian                   | 66,000                          | 236 [174 - 307]                          |                                          |
|           | 9/30/2024      | USA       | Permian                   | 61,000                          | 221 [165 - 282]                          |                                          |
|           | 10/13/2024     | USA       | Permian                   | 43,000                          | 327 [248 - 412]                          |                                          |
|           | 10/26/2024     | USA       | Permian                   | 47,000                          | 192 [141 - 252]                          |                                          |
|           | 10/27/2024     | USA       | Permian                   | 47,000                          | 354 [268 - 446]                          |                                          |
|           | 11/22/2024     | USA       | Permian                   | 35,000                          | 187 [133 - 249]                          |                                          |
|           | 12/29/2024     | USA       | Permian                   | 39,000                          | 337 [250 - 438]                          |                                          |
|           | 3/20/2025      | USA       | Permian                   | 41,000                          | 124 [90 - 162]                           |                                          |
| B         | 11/22/2024     | USA / MEX | Eagle Ford                | 52,000                          | 113 [83 - 148]                           | 114 [83 - 149]                           |
|           | 12/24/2024     | USA / MEX | Eagle Ford                | 16,000                          | 29 [16 - 46]                             |                                          |
|           | 12/25/2024     | USA / MEX | Eagle Ford                | 43,000                          | 84 [56 - 117]                            |                                          |
| C         | 9/12/2024      | USA       | San Joaquin               | 30,000                          | 71 [49 - 96]                             | 127 [95 - 162]                           |
|           | 9/25/2024      | USA       | San Joaquin               | 21,000                          | 66 [47 - 89]                             |                                          |
|           | 10/20/2024     | USA       | San Joaquin               | 17,000                          | 37 [25 - 52]                             |                                          |
|           | 11/21/2024     | USA       | San Joaquin               | 15,000                          | 56 [40 - 75]                             |                                          |
|           | 11/22/2024     | USA       | San Joaquin               | 12,000                          | 57 [40 - 79]                             |                                          |
|           | 5/8/2025       | USA       | San Joaquin               | 24,000                          | 43 [31 - 58]                             |                                          |
| D         | 11/24/2024     | UZB / TKM | Amu Darya                 | 35,000                          | 164 [121 - 213]                          | 192 [146 - 242]                          |
|           | 12/27/2024     | UZB / TKM | Amu Darya                 | 28,000                          | 154 [112 - 204]                          |                                          |
|           | 1/11/2025      | UZB / TKM | Amu Darya                 | 42,000                          | 103 [75 - 134]                           |                                          |
|           | 1/12/2025      | UZB / TKM | Amu Darya                 | 32,000                          | 157 [116 - 203]                          |                                          |
|           | 3/19/2025      | UZB / TKM | Amu Darya                 | 49,000                          | 187 [132 - 252]                          |                                          |
|           | 5/13/2025      | UZB / TKM | Amu Darya                 | 37,000                          | 134 [99 - 174]                           |                                          |
| E         | 9/9/2024       | IRN / IRQ | Zagros Foldbelt           | 18,000                          | 170 [129 - 217]                          | 251 [189 - 321]                          |
|           | 10/19/2024     | IRN / IRQ | Zagros Foldbelt           | 22,000                          | 79 [55 - 106]                            |                                          |
|           | 12/19/2024     | IRN / IRQ | Zagros Foldbelt           | 25,000                          | 177 [134 - 226]                          |                                          |
|           | 3/3/2025       | IRN / IRQ | Zagros Foldbelt           | 36,000                          | 116 [83 - 159]                           |                                          |
|           | 5/10/2025      | IRN / IRQ | Zagros Foldbelt           | 45,000                          | 126 [89 - 171]                           |                                          |
| F         | 7/5/2024       | TKM       | Amu Darya                 | 60,000                          | 220 [165 - 282]                          | 188 [141 - 239]                          |
|           | 9/30/2024      | TKM       | Amu Darya                 | 41,000                          | 95 [68 - 128]                            |                                          |
|           | 10/15/2024     | TKM       | Amu Darya                 | 26,000                          | 83 [60 - 109]                            |                                          |
|           | 5/13/2025      | TKM       | Amu Darya                 | 19,000                          | 200 [140 - 270]                          |                                          |

**Table S2:** Breakdown of methane emissions by sector for the aggregated observations domains for each region we present in this work. Uncertainties are provided for each sector. Unknown emissions represent quantified emission estimates from MethaneSAT that are more than 100-times higher than the expected methane emissions from the composite prior inventory.

| Region                            | Sector      | Emissions (t/h) | Lower bound (2.5%) | Upper bound (97.5%) |
|-----------------------------------|-------------|-----------------|--------------------|---------------------|
| <b>Permian</b>                    | Oil and gas | 408             | 303                | 516                 |
|                                   | Agriculture | 41.4            | 18.2               | 64.2                |
|                                   | Waste       | 1.8             | 0.8                | 2.7                 |
|                                   | Coal        | 0               | 0                  | 0                   |
|                                   | Other       | 2.3             | 0                  | 4.3                 |
|                                   | Unknown     | 0.4             | 0.3                | 0.5                 |
| <b>San Joaquin</b>                | Oil and gas | 30.2            | 20.3               | 41.1                |
|                                   | Agriculture | 80.8            | 55.9               | 106                 |
|                                   | Waste       | 8.9             | 4.4                | 12.9                |
|                                   | Coal        | 0               | 0                  | 0                   |
|                                   | Other       | 6.8             | 3.1                | 10.9                |
|                                   | Unknown     | 0.0             | 0.0                | 0.0                 |
| <b>Eagle Ford</b>                 | Oil and gas | 80.0            | 53.5               | 110                 |
|                                   | Agriculture | 27.7            | 14.9               | 41.5                |
|                                   | Waste       | 1.8             | 0.7                | 2.8                 |
|                                   | Coal        | 2.2             | 0                  | 2.0                 |
|                                   | Other       | 1.9             | 0.9                | 3.1                 |
|                                   | Unknown     | 0.9             | 0.6                | 1.1                 |
| <b>Amu Darya<br/>Uzbekistan</b>   | Oil and gas | 99.8            | 56.7               | 137                 |
|                                   | Agriculture | 72.8            | 42.3               | 106                 |
|                                   | Waste       | 15.1            | 10.2               | 21.1                |
|                                   | Coal        | 0               | 0                  | 0                   |
|                                   | Other       | 4.2             | 2.9                | 6.1                 |
|                                   | Unknown     | 0               | 0                  | 0                   |
| <b>Amu Darya<br/>Turkmenistan</b> | Oil and gas | 98.0            | 64.8               | 131                 |
|                                   | Agriculture | 60.2            | 37.7               | 85.0                |
|                                   | Waste       | 23.7            | 14.5               | 31.5                |
|                                   | Coal        | 0               | 0                  | 0                   |
|                                   | Other       | 5.8             | 3.9                | 8.7                 |
|                                   | Unknown     | 0.0             | 0.0                | 0.0                 |
| <b>Zagros Foldbelt</b>            | Oil and gas | 203             | 147                | 264                 |
|                                   | Agriculture | 32.6            | 21.1               | 45.2                |
|                                   | Waste       | 9.9             | 5.8                | 15.0                |
|                                   | Coal        | 0               | 0                  | 0                   |
|                                   | Other       | 5.0             | 3.2                | 8.1                 |
|                                   | Unknown     | 0               | 0                  | 0                   |

**Table S3:** Breakdown of methane emissions by sector for the aggregated observations domains and larger subregions (i.e., oil and gas basin domains) for each of the six regions we present in this work. Methane intensities normalized by gas- and energy-production are presented for each of the areas. No intensities are presented for “Mexico” as our estimates for oil and gas emissions in that portion of the Eagle Ford observation domain are minimal (i.e., <1 t/h).

| Region                                 | Oil and gas | Agriculture | Waste | Coal | Other | Unknown | Energy normalized intensity (kg CH <sub>4</sub> /GJ) | Gas-production normalized intensity (%) |
|----------------------------------------|-------------|-------------|-------|------|-------|---------|------------------------------------------------------|-----------------------------------------|
| <b>Widyan basin</b>                    | 20.2        | 9.7         | 3.4   | -    | 0.5   | -       | 0.03                                                 | 4.2%                                    |
| <b>Zagros Foldbelt basin</b>           | 156         | 22.7        | 5.9   | -    | 4.1   | -       | 0.24                                                 | 25.5%                                   |
| <b>Zagros observation domain</b>       | 203         | 32.6        | 9.9   | -    | 5.0   | -       | 0.16                                                 | 18.6%                                   |
|                                        |             |             |       |      |       |         |                                                      |                                         |
| <b>Amu Darya basin</b>                 | 97.0        | 59.3        | 23.6  | -    | 5.7   | -       | 0.57                                                 | 4.1%                                    |
| <b>Turkmenistan observation domain</b> | 98.0        | 60.2        | 23.7  | -    | 5.8   | -       | 0.40                                                 | 2.9%                                    |
|                                        |             |             |       |      |       |         |                                                      |                                         |
| <b>Amu Darya basin</b>                 | 97.3        | 67.1        | 14.1  | -    | 4.1   | 0.8     | 0.49                                                 | 3.6%                                    |
| <b>Uzbekistan observation domain</b>   | 99.8        | 72.8        | 15.1  | -    | 4.2   | -       | 0.51                                                 | 3.7%                                    |
|                                        |             |             |       |      |       |         |                                                      |                                         |
| <b>Mexico</b>                          | 3.2         | 19.7        | 0.8   | 1.4  | 1.5   | -       | -                                                    | -                                       |
| <b>USA</b>                             | 71.1        | 10.1        | 0.7   | 0.2  | 0.9   | -       | 0.19                                                 | 2.1%                                    |
| <b>Eagle Ford basin</b>                | 62.3        | 5.5         | 0.1   | 0.2  | 0.6   | -       | 0.17                                                 | 1.9%                                    |
| <b>Eagle Ford observation domain</b>   | 80.0        | 27.7        | 1.8   | 2.2  | 1.9   | 0.9     | 0.21                                                 | 2.4%                                    |
|                                        |             |             |       |      |       |         |                                                      |                                         |
| <b>San Joaquin basin</b>               | 25.9        | 64.1        | 5.4   | -    | 4.5   | -       | 0.40                                                 | 15.5%                                   |
| <b>San Joaquin observation domain</b>  | 30.2        | 80.8        | 8.9   | -    | 6.8   | -       | 0.42                                                 | 12.1%                                   |
|                                        |             |             |       |      |       |         |                                                      |                                         |
| <b>New Mexico</b>                      | 66.6        | 7.4         | 0.1   | -    | 0.2   | -       | 0.08                                                 | 1.3%                                    |
| <b>Texas</b>                           | 338         | 37.5        | 1.8   | -    | 2.0   | -       | 0.19                                                 | 3.1%                                    |
| <b>Midland subbasin</b>                | 112         | 4.6         | 0.5   | -    | 0.6   | -       | 0.11                                                 | 2.0%                                    |
| <b>Delaware subbasin</b>               | 178         | 11.7        | 0.1   | -    | 0.6   | -       | 0.12                                                 | 2.0%                                    |
| <b>Permian basin</b>                   | 397         | 32.2        | 1.7   | -    | 1.9   | 0.4     | 0.15                                                 | 2.5%                                    |
| <b>Permian observation domain</b>      | 408         | 41.4        | 1.8   | -    | 2.3   | 0.4     | 0.16                                                 | 2.6%                                    |
